# *Islet1* regulates establishment of the posterior hindlimb field upstream of the *Hand2-Shh* morphoregulatory gene network in mouse embryos

Junji Itou<sup>1,2</sup>, Hiroko Kawakami<sup>1,2</sup>, Thu Quach<sup>1</sup>, Marco Osterwalder<sup>3</sup>, Sylvia M. Evans<sup>4</sup>, Rolf Zeller<sup>3</sup> and Yasuhiko Kawakami<sup>1,2,5,6,\*</sup>

## SUMMARY

How divergent genetic systems regulate a common pathway during the development of two serial structures, forelimbs and hindlimbs, is not well understood. Specifically, *HAND2* has been shown to regulate *Shh* directly to initiate its expression in the posterior margin of the limb mesenchyme. Although the *Hand2-Shh* morphoregulatory system operates in both the forelimb and hindlimb bud, a recent analysis suggested that its upstream regulation is different in the forelimb and hindlimb bud. A combination of all four Hox9 genes is required for *Hand2* expression in the forelimb-forming region; however, it remains elusive what genetic system regulates the *Hand2-Shh* pathway in the hindlimb-forming region. By conditional inactivation of *Islet1* in the hindlimb-forming region using the *Hoxb6Cre* transgene, we show that *Islet1* is required for establishing the posterior hindlimb field, but not the forelimb field, upstream of the *Hand2-Shh* pathway. Inactivation of *Islet1* caused the loss of posterior structures in the distal and proximal regions, specifically in the hindlimb. We found that *Hand2* expression was downregulated in the hindlimb field and that *Shh* expression was severely impaired in the hindlimb bud. In the *Hoxb6Cre; Islet1* mutant pelvis, the proximal element that is formed in a *Shh*-independent manner, displayed complementary defects in comparison with *Pitx1*<sup>−/−</sup> hindlimbs. This suggests that *Islet1* and *Pitx1* function in parallel during girdle development in hindlimbs, which is in contrast with the known requirement for *Tbx5* in girdle development in forelimbs. Our studies have identified a role for *Islet1* in hindlimb-specific development and have revealed *Islet1* functions in two distinct processes: regulation upstream of the *Hand2-Shh* pathway and contributions to girdle development.

**KEY WORDS:** *Islet1*, *Hand2*, *Shh*, Limb, Forelimb-hindlimb, *Pitx1-Tbx4*, Mouse

## INTRODUCTION

Vertebrate limb buds emerge as paired protrusions in the lateral plate mesoderm (LPM), forelimb buds located anteriorly and hindlimb buds located posteriorly. The molecular and genetic systems for correct patterning and growth of the limb bud have been studied extensively, mainly in mouse and chick model systems, and have demonstrated that the forelimb and hindlimb buds share most of their developmental programs (Zeller et al., 2009). Studies of various animal models, such as chondrichthyes (cartilaginous fishes) and teleost fish, have illustrated that limb/fin developmental systems are evolutionarily conserved, and suggested lateral fin folds as the origin of paired appendages (Tanaka et al., 2002; Yonei-Tamura et al., 2008). Throughout the development of the limb and fin in animals examined so far, SHH is a central factor (Dahn et al., 2007; Krauss et al., 1993; Riddle et al., 1993). *Shh* encodes a secreted cell-cell signaling molecule expressed at the posterior margin, which defines the mesenchymal zone of polarizing activity (ZPA) in both forelimb and hindlimb buds (Riddle et al., 1993). SHH regulates anterior-posterior patterning

of digits and distal outgrowth of the limb bud (Chiang et al., 1996; Riddle et al., 1993; Yang et al., 1997). Several models have been proposed to explain the functions of *Shh* during limb development, such as the growth-morphogen model, the temporal expansion model and the biphasic model (Harfe et al., 2004; Towers et al., 2008; Zhu et al., 2008). In all these models, a central requirement is the localized expression of *Shh* in the posterior mesenchyme, which is tightly regulated. Recent analyses have uncovered the upstream regulatory system controlling *Shh* expression. Of particular importance is the basic helix-loop-helix transcription factor *HAND2*, which is expressed broadly in the LPM before limb outgrowth, but its subsequent expression becomes confined to the posterior region of both forelimb- and hindlimb-forming regions (Charite et al., 2000). *HAND2* activates *Shh* transcription in the ZPA by directly binding to the far upstream limb bud-specific cis-regulatory element in the *Shh* landscape (Galli et al., 2010). In the absence of *Hand2*, *Shh* activation is disrupted specifically in the limb bud, and the limb skeleton of *Hand2* conditional knockout embryos phenocopies that of *Shh*<sup>−/−</sup> embryos (Galli et al., 2010). Conversely, ectopic expression of *Hand2* induces a small ectopic anterior *Shh* expression domain (Fernandez-Teran et al., 2000; McFadden et al., 2002). Given that crucial functions of *Shh* in limb development are linked to its expression in the posterior limb bud, the elucidation of the genetic mechanisms upstream of the *Hand2-Shh* interactions is important.

A recent report has demonstrated a striking difference in the upstream regulation of limb-specific *Hand2-Shh* pathways. Inactivating all four Hox9 paralogs (*Hoxa9*, *Hoxb9*, *Hoxc9*, *Hoxd9*) resulted in the loss of both *Hand2* and *Shh* expression in mouse

<sup>1</sup>Department of Genetics, Cell Biology and Development, <sup>2</sup>Stem Cell Institute, <sup>3</sup>Developmental Biology Center, <sup>4</sup>Masonic Cancer Center, University of Minnesota, 321 Church St. SE, Minneapolis, MN 55455, USA. <sup>5</sup>Developmental Genetics, Department of Biomedicine, University of Basel, Mattenstrasse 28 CH-4058 Basel, Switzerland. <sup>6</sup>Skaggs School of Pharmacy, and Department of Medicine, University of California, San Diego, La Jolla, California 92093, USA.

\* Author for correspondence (kawak005@umn.edu)

forelimb buds (Xu and Wellik, 2011). However, expression of the four Hox9 genes overlaps in the forelimb- but not hindlimb-forming area. Consistent with this expression pattern, Hox9 genes are required only in the forelimb-forming area, whereas hindlimb development proceeds normally and *Hand2* and *Shh* are expressed normally in hindlimb buds of mouse embryos lacking all four Hox9 paralogs. This observation indicates that these two homologous tissues, the fore- and hindlimb bud; use different mechanisms to enable *Hand2*-dependent activation of *Shh* expression at the posterior margin. Furthermore, the hindlimb bud-specific mechanism acting upstream of this *Hand2*-*Shh* pathway remained thus far elusive.

Given that the overlapping expression of four Hox9 genes is detected in the forelimb-forming area, it is conceivable that gene(s) selectively expressed in the hindlimb-forming area function upstream of the *Hand2*-*Shh* pathway. Knockout studies of genes expressed specifically in the hindlimb-forming region, such as *Tbx4*, *Pitx1* and *Hoxc10*, failed to demonstrate an involvement in regulation of the *Hand2*-*Shh* pathway. In *Tbx4*<sup>-/-</sup> embryos, *Hand2* remains expressed in the hindlimb-forming region (Naiche and Papaioannou, 2003). *Pitx1*<sup>-/-</sup> embryos develop small hindlimbs with five digits, except for the loss of the anterior-most digit in an inbred 129sv genetic background, which pointed to the absence of significant defects in the *Hand2*-*Shh* pathway. *Pitx1*<sup>-/-</sup> embryos also exhibited a specific loss of the ilium, the anterior segment of the pelvic girdle, indicating its contribution to development of the anterior-proximal element (Lancot et al., 1999; Marcil et al., 2003; Szeto et al., 1999). Inactivating *Hoxc10*, which marks the hindlimb forming region along with other Hox10 genes (*Hoxa10* and *Hoxd10*) resulted in axial transformations, but only stylopod development was affected (McIntyre et al., 2007; Wellik, 2007; Wellik and Capecchi, 2003). These studies indicate that *Tbx4*, *Pitx1* and *Hoxc10*, in combination with other Hox10 genes, are not required to regulate the *Hand2*-*Shh* pathway in the hindlimb.

In this study, we identify *Islet1* (*Isl1* – Mouse Genome Informatics), a LIM-homeodomain protein, as a key upstream regulator that controls the *Hand2*-*Shh* pathway specifically in hindlimb buds. *Islet1* expression is restricted to hindlimb progenitors, but not to forelimb progenitors (Kawakami et al., 2011; Yang et al., 2006). Our recent analysis demonstrated that *Tcre*-mediated early inactivation of *Islet1* resulted in a complete failure to initiate hindlimb bud development (Kawakami et al., 2011). This phenotype was caused by the lack of proliferation of hindlimb progenitors in the LPM and failure to activate the *Fgf10*-*Fgf8* feedback loop formation. In this article, we conditionally inactivated *Islet1* by using the *Hoxb6Cre* line, which causes Cre-dependent recombination in LPM later than *Tcre* (Lowe et al., 2000). This strategy appeared to bypass the early requirement of *Islet1*, and a large fraction of mutant embryos developed hindlimb buds. The mutant hindlimb buds exhibited downregulation of *Shh* expression, which is preceded by downregulation of *Hand2* expression in the hindlimb-forming region. Our data reveal a novel *Islet1*-dependent genetic mechanism that controls specifically hindlimb bud development. This mechanism differs from the Hox9-dependent control of early forelimb bud development but converges at the level of *Hand2* expression. Moreover, our results point to independent functions of *Islet1* and *Pitx1* in the patterning of distinct segments of the pelvic girdle in hindlimbs, in contrast to the contribution of *Tbx5* to the development of the shoulder girdle as a whole in forelimbs (Rallis et al., 2003).

## MATERIALS AND METHODS

### Mouse lines

The *Islet1*<sup>fllox/flox</sup> (Song et al., 2009; Sun et al., 2008), *Hoxb6Cre* (Lowe et al., 2000), *Prx1Cre* (Logan et al., 2002) and *Hand2*<sup>+/-</sup> (Galli et al., 2010) mouse lines were published previously. *Islet1*<sup>+/-</sup> mice were generated by germline recombination of *Islet1*<sup>fllox</sup> allele by the *CMV-Cre* line. *Islet1*<sup>fllox/flox</sup>, *Hoxb6Cre*; *Islet1*<sup>+/-</sup> and *Hand2*<sup>+/-</sup> were maintained on a mixed genetic background. Skeletal preparation was carried out as previously published (Kawakami et al., 2009). All of the animal breeding and procedures in the Kawakami laboratory were performed according to the approval by the Institutional Animal Care and Use Committee of University of Minnesota. Studies involving mice in the Zeller laboratory were performed in accordance with Swiss law after being approved by the Joint Commission on Experiments involving Animals of the Cantons of Argovia and both Basel.

### Gene expression analysis

In situ hybridization was performed according to a standard procedure (Bluske et al., 2009; Kawakami et al., 2009; Wilkinson, 1993). For quantitative RT-PCR (qRT-PCR) analysis, we collected RNA from the hindlimb bud of each embryo at embryonic day (E) 10.5 using Trizol (Invitrogen), reverse-transcribed 1 µg total RNA with oligo dT primer and Superscript III (Invitrogen) and analyzed with an Eppendorf Mastercycler by the TaqMan method following manufacturer's instructions (Applied Biosystems). Probes used were *Shh* (Mm\_00436528\_m1), *Gli1* (Mm\_00494645\_m1), *Pitx1* (Mm\_00436026\_m1), *Pitx1* (Mm\_00440824\_m1) and *Tbx4* (Mm\_00550372\_m1), and TATA-binding protein (*Tbp*) transcripts were used as an internal control (Mm\_00446973\_m1). Relative transcript levels were normalized using *Tbp* as internal standard and the average of specific transcript levels of control embryos was set to 100% (*n*=6 embryos). In the case of analysis of *Shh* transcript, owing to undetectable levels of *Shh* at E10.5 in mutant hindlimb buds, we pooled hindlimb buds from three E11.5 embryos with identical genotype as a group. Four groups of control and mutant embryos were analyzed. Statistical significance was examined by the independent *t*-test.

### Immunofluorescence and histochemistry

Anti-ISLET1 immunofluorescence was carried out according to a standard method (Kawakami et al., 2011) with mouse anti-ISLET1 (39.4D5, Developmental Studies Hybridoma Bank). Detection was carried out using an Alexa488-anti-mouse IgG and a Zeiss LSM710 laser scanning confocal microscope or an HRP-anti-mouse IgG and a Zeiss Axioskop2 compound microscope. For double detection of *Hand2* mRNA and ISLET1, section in situ hybridization was performed first with FITC-labeled *Hand2* probe, then, sections were incubated with anti-ISLET1, and signals were detected by Alexa488-anti-FITC and Alexa594-anti-mouse IgG. The fluorescent signals were detected using a Zeiss LSM710 laser scanning confocal microscope.

## RESULTS

### Conditional inactivation of *Islet1* causes hindlimb defects

*Islet1* is expressed in the posterior embryo, including the hindlimb-forming region (Yang et al., 2006). Development of *Islet1*-deficient embryos arrests at E9.5 with severe cardiac defects (Cai et al., 2003; Pfaff et al., 1996), which precedes development of hindlimb buds. Thus, we conditionally inactivated *Islet1* in the LPM, where hindlimb bud precursors arise. Cre-mediated recombination by *Hoxb6Cre* has been shown to take place in the LPM before outgrowth of the hindlimb bud (Li et al., 2005; Lowe et al., 2000). To establish that this approach eliminates ISLET1 from the hindlimb-forming region prior to the onset of hindlimb budding, we examined ISLET1 immunoreactivity in the LPM of the hindlimb-forming region in mutant embryos (*Hoxb6Cre*<sup>Tg/+</sup>; *Islet1*<sup>fllox/-</sup>, hereafter referred to as *Hoxb6Cre*; *Isl1* cKO) at E9.25-9.5 (20-24 somite stage). Compared with wild-type embryos (*n*=3),

Table 1. Digit numbers in hindlimbs of *Isl1* cKO embryos and newborn mice

| Digit number | Number of hindlimbs |
|--------------|---------------------|
| 0*           | 4 (4.3%)            |
| 1            | 7 (7.6%)            |
| 2            | 23 (25.0%)          |
| 3            | 40 (43.5%)          |
| 4            | 11 (12.0%)          |
| 5            | 7 (7.6%)            |
| Total        | 92                  |

Embryos at  $\geq$ E14.5 and newborns were examined. Both hindlimbs in each embryo were scored independently.  
\*, no hindlimb developed.

ISLET1 was undetectable in LPM of the hindlimb-forming region in four out of nine *Hoxb6Cre; Isl1* cKO embryos (supplementary material Fig. S1D). Three out of nine embryos showed a faint signal in the LPM (supplementary material Fig. S1C), and two out of nine embryos showed clearly detectable ISLET1 signal (supplementary material Fig. S1B), although it was reduced in comparison with wild-type controls. These results indicate that *Hoxb6Cre* inactivates *Isl1* with variable efficiency resulting in variable hypomorphic phenotypes. In particular, the early hindlimb initiation defects observed in *Tcre; Isl1* mutants (Kawakami et al., 2011) are bypassed in a significant fraction of embryos, thereby allowing analysis of altered early hindlimb bud development.

*Hoxb6Cre; Isl1* cKO embryos exhibited defects in hindlimb development with varying severity in digit loss (Table 1, Fig. 1). In the most severe cases, no hindlimbs formed (4.3%; Fig. 1G) and only the pelvic girdle, which attaches the leg to vertebrae, was apparent (Fig. 1I). It is most likely that this phenotype reflected the morphological consequences of disrupting the *Isl1*-dependent activation of the *Fgf10-Fgf8* feedback loop that is normally required for initiation of limb outgrowth (Kawakami et al., 2011). In the pelvic girdle, the ilium was formed, but the pubis and ischium were not patterned (Fig. 1W). However, in a fraction of *Hoxb6Cre; Isl1* mutant embryos, this complete disruption of hindlimb development was bypassed by hypomorphic ISLET1 levels (supplementary material Fig. S1;  $n=5/9$ ). Almost half of mutant embryos (43.5%) displayed hindlimbs with three digits and one zeugopodal bone in combination with a malformed pelvic girdle (Fig. 1D,O-S). Less severely affected hindlimbs with four digits were also observed (for details, see Table 1 and Fig. 1T-1V). In these mutants, the most posterior digit 5 was always missing, whereas the most anterior digit 1 formed. The morphology of the other digits probably corresponded to digit 2-4, providing further evidence for the hypomorphic nature of the conditional inactivation (supplementary material Fig. S1). A similar variation of digit loss was observed in the hindlimb of *Hand2* cKO embryos (Galli et al., 2010), suggesting that the heterogeneity of inactivation could be the cause of the variation in phenotype. The single zeugopodal element observed in *Hoxb6Cre; Isl1* cKO hindlimbs articulates with the femur (Fig. 1M,R) and, thus, is likely to correspond to the tibia, which indicates that the posterior zeugopod element (fibula) was lost. All mutants with one or two digits also exhibited similar phenotypes in the zeugopod and pelvic girdle, although mutants with four digits showed variable phenotypes in these elements. Thus, the majority of mutants exhibited similar skeletal defects with variable number of digits. No skeletal defects were observed in mutant forelimbs (Fig. 1B,E,H) as *Hoxb6Cre*-mediated recombination takes place only in the posterior half of the forelimb field (Lowe et al., 2000). This is consistent with our recent analysis

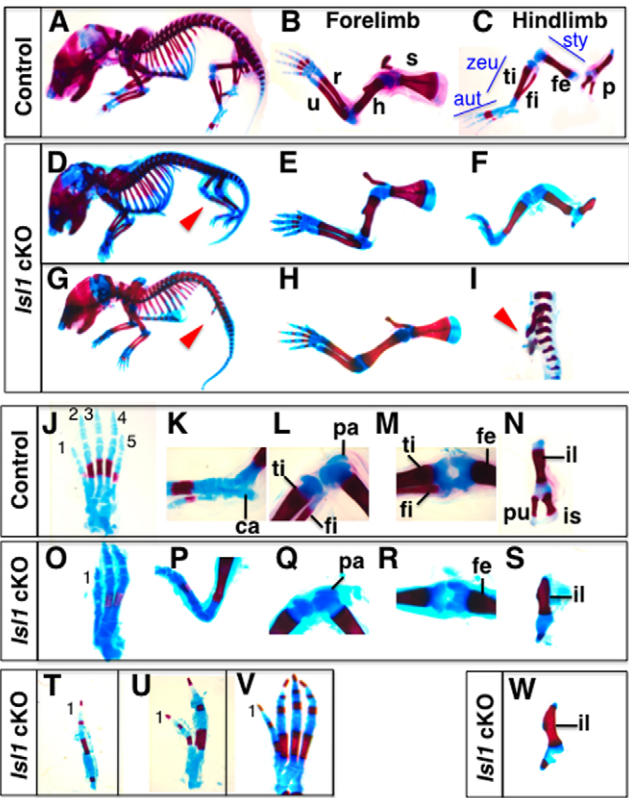

**Fig. 1. Hindlimb-specific defects in *Hoxb6Cre; Isl1* conditional knockout mice.** Skeletal preparations of newborn control (*Hoxb6Cre<sup>Tg/+</sup>; Isl1<sup>flox/+</sup>*; A-C, J-N) and mutant (*Hoxb6Cre<sup>Tg/+</sup>; Isl1<sup>flox/-</sup>*; D-I, O-W) mice. (A-C) Lateral views of the control mouse (A). In the forelimb (B), the scapula (s), humerus (h), radius (r) and ulna (u) are indicated, and in the hindlimb (C), pelvic girdle (p), femur (fe), tibia (ti) and fibula (fi) are indicated. Aut, autopod; sty, stylopod; zeu, zeugopod. (D-I) Lateral views of *Isl1* cKO newborn with three digits in a leg (D-F) and a mutant lacking hindlimbs (G-I). In both cases, defects specific to the hindlimb (red arrowheads) were observed (D,G). Forelimbs formed normally (E,H) but only one zeugopodal bone formed in a mutant (F). In the mutant lacking hindlimbs, only the pelvic girdle is present (arrowhead, I) (J-N) Dorsal view of the hindlimb autopod (J), lateral views of the ankle (K) and knee (L) and dorsal views of the knee (M) and pelvic girdle (N) of a control mouse. Digits are numbered 1-5. The calcaneus (ca) in the ankle, and the patella (pa) in the knee are structures characteristic for hindlimbs. (O-S) Dorsal view of the hindlimb autopod with three digits (O). The calcaneus is missing in the ankle (P), but the patella is present in the knee (Q). The knee articulation in *Isl1* cKO hindlimbs is similar to that in controls (R). The mutant pelvic girdle consists of an ilium (il) located anteriorly, whereas ischium (is) and pubis (pu) failed to develop. (T-W) Mutants with one digit (T), two digits (U) or four digits (V) were also obtained. In all cases the most anterior digit 1 was present and the most posterior digit (digit 5) was lost (O,T-V). In case of hindlimb aplasia, a pelvic girdle with a morphology similar to the other phenotypic groups formed (W).

of *Tcre; Isl1* cKO embryos, in which *Isl1* is inactivated in the forelimb-field, but with no alteration of forelimb bud development by E10.0 (Kawakami et al., 2011). Moreover, inactivating *Isl1* using the *Prx1Cre* transgene, a limb mesenchyme-specific deleter, did not alter development of the forelimb skeleton ( $n=10$  at E15.5 and  $n=8$  in neonates; supplementary material Fig. S2). In summary, this analysis reveals the specific but variable loss of posterior skeletal elements in hindlimbs of a large fraction of *Hoxb6Cre; Isl1*



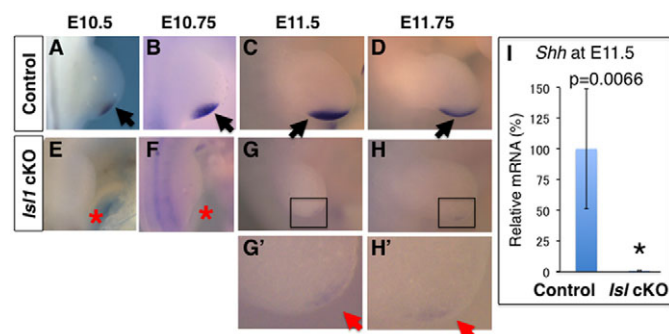

**Fig. 2. *Shh* expression is downregulated in *Hoxb6Cre; Isl1* cKO hindlimb buds.** (A-D) *Shh* expression in the control hindlimb bud at the stages indicated. *Shh* expression initiates in a small posterior mesenchymal domain (A) and expands distally (B,C) and is downregulated in advanced stages (D). Black arrowheads indicate normal expression. (E-H') In mutant hindlimb buds, no *Shh* expression was detected at E10.5 (E) and E10.75 (F). At E11.5 (G,G') and E11.75 (H,H'), very low levels of *Shh* transcripts were detected. G' and H' are magnified views of the boxed areas in G and H. Red arrowheads and asterisks indicate reduced and no expression, respectively. (I) qRT-PCR analysis of *Shh* transcripts in hindlimbs at E11.5. The relative *Shh* levels in mutant hindlimbs ( $n=4$ , 0.6%) in comparison with control littermate hindlimb buds ( $n=4$ ) is shown as average  $\pm$ s.d.

cKO embryos. These phenotypes are reminiscent of the limb skeletal defects caused by variable reduction of *Shh* transcript levels (Galli et al., 2010).

### Significant reduction of *Shh* expression in the hindlimb bud of *Hoxb6Cre; Isl1* cKO embryos

*Shh* is a crucial factor for regulating anterior-posterior patterning and progenitor expansion in the developing limb bud (Towers and Tickle, 2009; Zeller et al., 2009). Thus, we examined *Shh* expression by in situ hybridization. Because the morphological phenotype shows variation, we examined three to four mutant embryos at each stage, and analyzed mutant embryos with smaller hindlimb buds and comparable forelimb bud size in comparison with wild-type controls. At E10.5 ( $n=4$ ) and E10.75 ( $n=3$ ), when *Shh* expression normally expands within the posterior mesenchyme of wild-type limb buds (Fig. 2A,B), no *Shh* expression was detected in *Hoxb6Cre; Isl1* cKO hindlimb buds (Fig. 2E,F). At E11.5-11.75, when *Shh* is expressed strongly in the distal-posterior mesenchyme of wild-type limb buds (Fig. 2C,D), only very low ( $n=3$ ) or no ( $n=1$ ) *Shh* expression was seen in mutant hindlimb buds (Fig. 2G-H',I). Collectively, these results demonstrated that in *Hoxb6Cre; Isl1* cKO hindlimb buds, *Shh* expression is very much lowered or even lost from early hindlimb bud stages onwards.

### Reduced levels of SHH signaling in hindlimb buds of *Hoxb6Cre; Isl1* cKO embryos

Loss of *Shh* results in the development of an autopod with a rudimentary anterior digit (Chiang et al., 1996), which was also observed in 7.6% of all *Hoxb6Cre; Isl1* cKO hindlimbs. However, the hypomorphic nature of the digit loss suggests that SHH signal transduction might occur even at low levels of *Shh* expression. Therefore, expression of *Gli1* and patched homolog 1 (*Ptch1*), two transcriptional targets of SHH signaling, was examined. Consistent with absent or reduced levels of *Shh* expression in *Hoxb6Cre; Isl1* cKO hindlimb buds, *Gli1* and *Ptch1* expression was variable. In

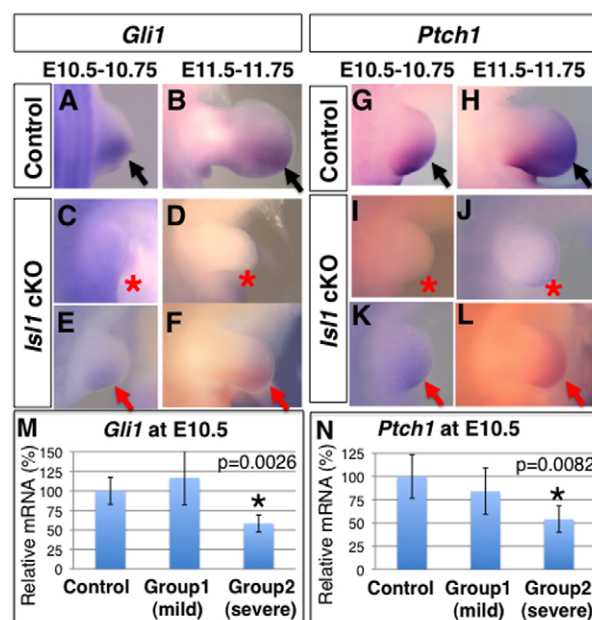

**Fig. 3. Reduction of SHH signaling in *Hoxb6Cre; Isl1* cKO hindlimb buds.** (A-L) Lateral views of *Gli1* (A-F) and *Ptch1* (G-L) expression in control (A,B,G,H) and *Hoxb6Cre; Isl1* cKO (C-F,I-L) hindlimb buds. Black arrowheads indicate normal expression, red arrowheads and asterisks indicate reduced and no expression, respectively. (A-F) *Gli1* expression in the posterior mesenchyme at E10.5-10.75 (A) and 11.5-11.75 (B) was either not detected (C,D) or significantly downregulated (E,F) in *Isl1* cKO hindlimbs. (G-L) *Ptch1* expression in the posterior mesenchyme at E10.5-10.75 (G) and 11.5-11.75 (H) was either not detected (I,J) or significantly downregulated (K,L) in *Isl1* cKO hindlimbs. (M,N) qRT-PCR analysis of *Gli1* (M) and *Ptch1* (N) transcript levels in hindlimb buds at E10.5. The relative transcript levels in two groups of mutants ( $n=6$  in group1,  $n=4$  in group2) in comparison with controls ( $n=6$ ) are shown as average  $\pm$ s.d. Asterisks indicate statistically significant changes.

particular at E10.5-10.75, *Gli1* ( $n=2/4$ ) and *Ptch1* ( $n=2/4$ ) were not expressed in half of all hindlimb buds (Fig. 3A,C,G,I), and low levels were detected in the others (Fig. 3E,K). This was similar at E11.5-11.75 for both *Gli1* and *Ptch1* expression (Fig. 3B,D,F,H,J,L). qRT-PCR analysis at E10.5 revealed that there were two groups of embryos. In a subset of mutant hindlimb buds ( $n=6$ ), we detected *Gli1* and *Ptch1* transcripts levels similar to those in control littermates ( $n=6$ ). However, in a distinct subset ( $n=4$ ), *Gli1* (58.3%,  $P=0.0026$ ) and *Ptch1* (54.3%,  $P=0.0082$ ) expression was significantly reduced in comparison with control littermates (Fig. 3M,N). The significant degree of variation of *Gli1* and *Ptch1* transcript levels observed by qRT-PCR analysis agrees with the variable expression detected by RNA in situ hybridization. Data-based mechanistic models of how SHH controls limb bud patterning, such as the biphasic and temporal expansion models (Harfe et al., 2004; Zhu et al., 2008), depend crucially on high levels of SHH signaling for specification of posterior digits. The lack of the posterior-most digit 5 in most *Hoxb6Cre; Isl1* cKO hindlimb buds ( $n=83/88$ ) is consistent with the observed low levels of SHH signal transduction. Taken together, our results suggest that, owing to the variability in inactivating the conditional *Islet1* allele, the levels of *Shh* transcripts and SHH signal transduction are also variable. This provides a molecular explanation for the variable penetrance of the skeletal phenotypes in hindlimb buds.

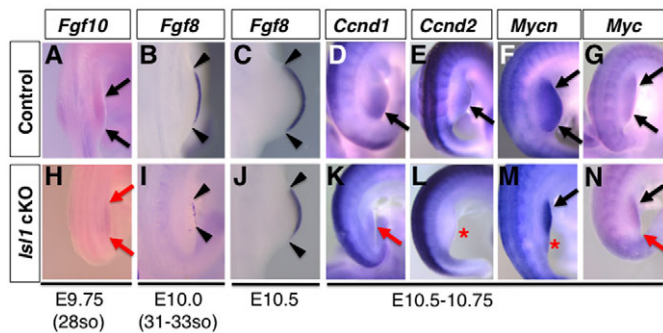

**Fig. 4. Reduced expression of *Fgf10*, *Fgf8*, cyclin type D and *Myc* genes in *Hoxb6Cre*; *Isl1* cKO hindlimb buds.** (A–N) Expression of *Fgf10* (A,H), *Fgf8* (B,C,I,J), *Ccnd1* (D,K), *Ccnd2* (E,L), *Mycn* (F,M) and *Myc* (G,N) in control (A–G) and *Hoxb6Cre*; *Isl1* cKO (H–N) hindlimb buds at the indicated stages. Mesenchymal *Fgf10* expression in mutant hindlimb buds (H, red arrows) was detected at lower levels in comparison with controls at E9.75 (A, black arrows). AER-*Fgf8* expression in mutant hindlimb buds (I,J) was detected in a narrower than normal expression domain (B,C). Arrowheads in B, C, I and J indicate the anterior and posterior edges of the AER-*Fgf8* expression domain. (D–G,K–N) In comparison with controls (black arrows in D–G), *Ccnd1* expression was reduced in posterior mesenchyme of hindlimb buds (K, red arrow). Also the expression of *Ccnd2* was significantly downregulated (L, red asterisk). In the posterior mesenchyme, *Mycn* expression was downregulated (M, red asterisk) and *Myc* expression was weaker (N, red arrow), whereas their expression in the anterior was not significantly altered (black arrows).

Additional transcriptional targets of SHH signal transduction include *Hoxd13* in the distal mesenchyme (Riddle et al., 1993) and *Fgf4* in the apical ectodermal ridge (AER; as part of the SHH/GREM1/FGF feedback loop) (Zuniga et al., 1999). In particular, *Hoxd13* is expressed by the autopod primordia, with the exception of the anterior-most domain in wild-type limb buds (supplementary material Fig. S3A). In *Hoxb6Cre*; *Isl1* cKO hindlimb buds, the posterior domain of *Hoxd13* was reduced (supplementary material Fig. S3G). *Fgf4* expression, which is restricted to the posterior half of the AER, was also more restricted in *Hoxb6Cre*; *Isl1* cKO hindlimb buds. (supplementary material Fig. S3B,H). Likewise, the posterior expression domains of *Tbx2* and *Tbx3* were also reduced in *Hoxb6Cre*; *Isl1* cKO hindlimb buds, whereas anterior expression was upregulated (supplementary material Fig. S3C,D,I,J), similar to *Shh*<sup>−/−</sup> forelimb buds (Galli et al., 2010). Furthermore, the normally anteriorly restricted expression of *Alx4* and *Irx3* expanded posteriorly in *Hoxb6Cre*; *Isl1* cKO hindlimb buds (supplementary material Fig. S3E,F,K,L). These expression patterns pointed to a reduction of posterior gene expression and an expansion of anterior gene expression owing to the drastic lowering of SHH signal transduction in *Hoxb6Cre*; *Isl1* cKO hindlimb buds.

#### Reduced expression and activity of the *Fgf10*-*Fgf8* feedback loop and cell cycle-related genes in hindlimb buds of *Hoxb6Cre*; *Isl1* cKO embryos

Distal outgrowth of limb buds requires maintenance of mesenchymal proliferation by the mesenchymal *Fgf10* to ectodermal *Fgf8* feedback loop (Capdevila and Izpisua Belmonte, 2001). Thus, we examined expression of these genes during early stages of hindlimb bud outgrowth. *Fgf10* expression was reduced in *Hoxb6Cre*; *Isl1* cKO hindlimb buds at E9.75 in comparison with controls ( $n=4/5$ ; Fig. 4A,H). Similarly, *Fgf8* was detected in a

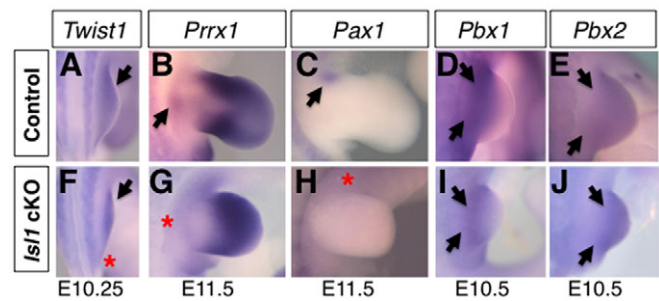

**Fig. 5. Altered pelvis marker gene expression in *Hoxb6Cre*; *Isl1* cKO hindlimb buds.** (A–J) Analysis of *Twist1* (A,F), *Prrx1* (B,G), *Pax1* (C,H), *Pbx1* (D,I) and *Pbx2* (E,J) expression in control (A–E) and mutant (F–J) hindlimb buds at E10.25–E11.5. *Twist1* expression is detected both in control (A) and mutant (F) hindlimb buds (arrow), but its posterior-proximal expression is downregulated in mutant hindlimb buds (asterisk, F). *Prrx1* expression in the proximal region in control hindlimb buds (B, arrow) is lacking from mutant hindlimb buds (G, asterisk). *Pax1* is normally expressed in the proximal-anterior region (C, arrow) and is lost from mutant hindlimb buds (H, asterisk). *Pbx1* (D,I) and *Pbx2* (E,J) is expressed in both control and mutant hindlimb buds (arrows).

narrower AER domain in mutant than control hindlimb buds at E10.0 ( $n=3/3$ ; Fig. 4B,I). The AER-*Fgf8* expression domain expanded in E10.5 mutant hindlimb buds, but remained smaller than in control hindlimb buds ( $n=2/3$ ; Fig. 4C,J). The reduced expression of both mesenchymal *Fgf10* and AER *Fgf8* pointed to reduced *Fgf10*-*Fgf8* feedback loop activity, which, in combination with reduced SHH signal transduction, is the likely cause underlying the smaller hindlimb buds in *Hoxb6Cre*; *Isl1* cKO embryos.

Consistent with this idea, we found that expression of D type cyclin genes and *Myc* genes was lowered preferentially in the posterior mesenchyme of *Hoxb6Cre*; *Isl1* cKO hindlimb buds (Fig. 4D–G,K–N). These genes are known targets of SHH and FGF signaling, and are involved in cell cycle progression (Mill et al., 2005; Roy and Ingham, 2002; ten Berge et al., 2008). Alterations in expression of these genes are also consistent with the loss of the tibia and digit 5 as evidenced by the skeletal preparations.

#### Proximal patterning defects in *Hoxb6Cre*; *Isl1* cKO hindlimb buds

*Hoxb6Cre*; *Isl1* cKO hindlimb skeletons also exhibited proximal defects (Fig. 1N,S,W) as in particular the pubis and ischium, two posterior segments of the pelvic girdle, were missing. As *Shh*<sup>−/−</sup> limbs develop normal proximal structures (Chiang et al., 2001; Kraus et al., 2001), the proximal defects are likely to be due to alterations other than the downregulation of *Shh*. Therefore, we examined expression of some of genes involved in the development of the pelvic girdle (Capellini et al., 2011). Indeed, the expression of *Twist1* and *Prrx1* in the proximal hindlimb bud was reduced and *Pax1* expression was lost in *Hoxb6Cre*; *Isl1* cKO hindlimb buds (Fig. 5A–C,F–H). These observations are consistent with the requirement of these three genes for development of the pubis, pubic symphysis and ischium (Krawchuk et al., 2010; Kuijper et al., 2005; ten Berge et al., 1998). By contrast, expression of *Pbx1* and *Pbx2* in the proximal region of mutant hindlimbs was similar to that of control embryos (Fig. 5D,E,I,J). *Pbx* genes are important for development of the ilium (Capellini et al., 2011), which was not affected in *Hoxb6Cre*; *Isl1* cKO hindlimbs. These results indicate that *Isl1* regulates the



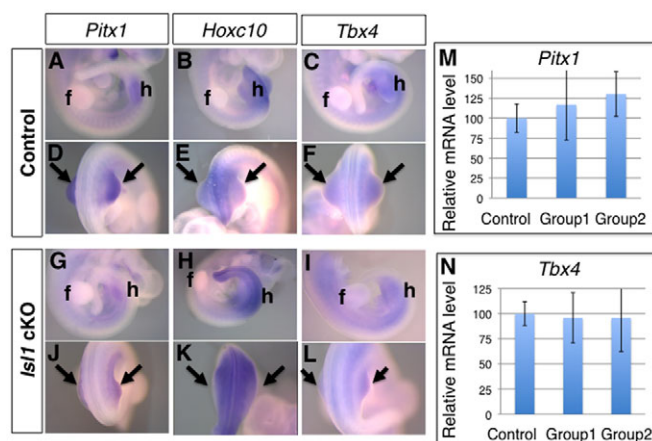

**Fig. 6. Hindlimb bud-specific gene expression is maintained in *Hoxb6Cre; Isl1* cKO embryos.** (A-L) Expression of *Pitx1* (A,D,G,J), *Hoxc10* (B,E,H,K) and *Tbx4* (C,F,I,L) in control (A-F) and *Hoxb6Cre; Isl1* cKO (G-L) embryos at E10.5. Lateral views (A-C,G-I) and dorsal views (D-F,J-L) are shown. *Pitx1* was detected both in control (A,D) and *Isl1* cKO (G,J) hindlimb buds. *Hoxc10* was detected in control (B,E) and *Isl1* cKO (H,K) hindlimb buds. *Tbx4* was detected in control (C,F) and *Isl1* cKO (I,L) hindlimb buds. Arrows point to the expression in the hindlimb bud. f, forelimb buds; h, hindlimb buds. (M,N) qRT-PCR analysis of *Pitx1* (M) and *Tbx4* (N) transcripts in hindlimbs at E10.5. The relative transcript levels in two groups of mutants ( $n=6$  in group1,  $n=4$  in group2) in comparison with controls ( $n=6$ ) are shown as average  $\pm$  s.d. The same samples as for the analysis shown in Fig. 3 are used.

genetic programs that regulate the development of the proximal-posterior structures independently from its requirement for correct activation of the SHH pathway.

### ***Isl1* appears to not be required for establishing hindlimb bud-specific characters**

*Pitx1*, a homeodomain protein, is required and sufficient for determining hindlimb-specific characters (DeLaurier et al., 2006; Lanctot et al., 1999; Logan and Tabin, 1999; Szeto et al., 1999), whereas the role of *Tbx4*, a T-box transcription factor, in hindlimb specification remains controversial (Minguillon et al., 2005; Naiche and Papaioannou, 2007; Ouimette et al., 2010). Localized expression of *Isl1* in hindlimb progenitors (Yang et al., 2006) suggests that it might be involved in establishing hindlimb-specific characters. Examination of the skeletal elements in *Hoxb6Cre; Isl1* cKO hindlimbs revealed the normal knee articulation and presence of the patella, an element specific to hindlimbs (Fig. 1L,Q). However, the calcaneus, a hindlimb-specific structure in the autopod was missing (Fig. 1K,P). The latter aplasia might be secondary to the autopod hypoplasia rather than indicative of losing hindlimb-specific characters. Thus, we addressed further the possible contribution of *Isl1* to establishing hindlimb-specific characters by analyzing the expression of hindlimb-specific genes, such as *Pitx1*, *Tbx4* and *Hoxc10*, in *Hoxb6Cre; Isl1* cKO embryos at E10.5 (Fig. 6). In situ hybridization failed to reveal any significant differences between wild-type and mutant hindlimb buds. In addition, we examined expression of *Pitx1* and *Tbx4* at E10.5 by qRT-PCR. In both group 1 mutants (*Gli1* and *Ptch1* levels not significantly altered, Fig. 3M,N) and group 2 mutants (*Gli1* and *Ptch1* levels downregulated, Fig. 3M,N), levels of *Pitx1* and *Tbx4* were comparable to controls (Fig. 6M,N). These results showed that the expression of hindlimb bud-specific genes was not altered

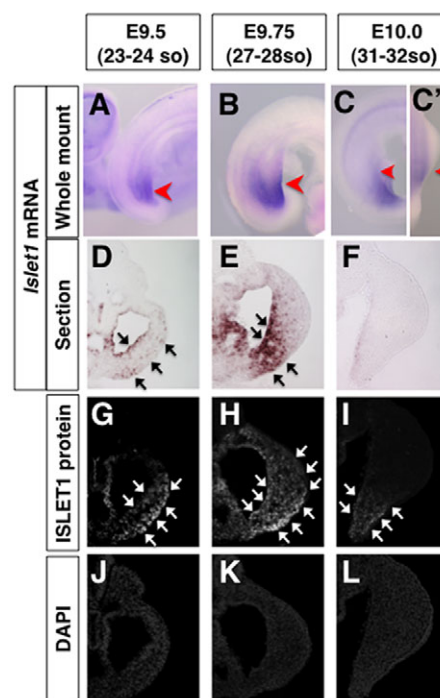

**Fig. 7. Spatial distribution of *Isl1* mRNA and ISLET1 protein in hindlimb buds.** (A-C') RNA in situ hybridization showing the expression of *Isl1* in the hindlimb field and bud. Red arrowheads indicate the approximate positions of sections shown in panels D-L. Dorsal-lateral views of the E9.5 (A) and E9.75 (B) embryos show the expression of *Isl1* in the posterior hindlimb field. Lateral (C) and dorsal (C') views of the E10.0 embryo show absence of *Isl1* expression in hindlimb buds. (D-L) *Isl1* section RNA in situ hybridization (D-F) and ISLET1 protein immunostaining (G-I) using adjacent sections, and DAPI analysis (J-L) of the sections shown in panels G-I. Immunoreactive ISLET1 proteins (G,H) were detected in more cells than were *Isl1* transcripts (D,E) at E9.5 and E9.75. *Isl1* mRNA was barely detectable in hindlimb buds at E10.0 (F), whereas ISLET1 proteins remained in the ventral part of the posterior hindlimb bud (I). Black and white arrows indicate *Isl1* and ISLET1 positive areas, respectively.

in *Hoxb6Cre; Isl1* cKO embryos and indicated that *Isl1* is not required to establish and/or maintain hindlimb-specific character after activation of the *Fgf10-Fgf8* feedback loop (Kawakami et al., 2011).

### ***Isl1* is a hindlimb-specific upstream regulator of the *Hand2-Shh* morphoregulatory network**

*Isl1* expression is downregulated during initiation of hindlimb bud outgrowth (Yang et al., 2006) (Fig. 7) and does not overlap *Shh* expression, which suggests that *Isl1* probably controls a regulator(s) of *Shh* expression. Molecular analysis of *Hand2*-deficient limb buds has shown that the HAND2 transcriptional regulator is required for activation *Shh* expression in the ZPA during the early phase of limb development (Charite et al., 2000; Galli et al., 2010). In particular, conditional *Hand2* inactivation disrupts *Shh* activation and the resulting skeletal phenotypes are strikingly similar to *Shh*<sup>-/-</sup> limbs (Galli et al., 2010). Thus, we investigated whether *Isl1* regulates *Hand2* upstream of *Shh* expression. We first examined the ISLET1 protein distribution in hindlimb buds, and discovered that ISLET1 proteins persisted after its transcription had been downregulated (Fig. 7). ISLET1-positive

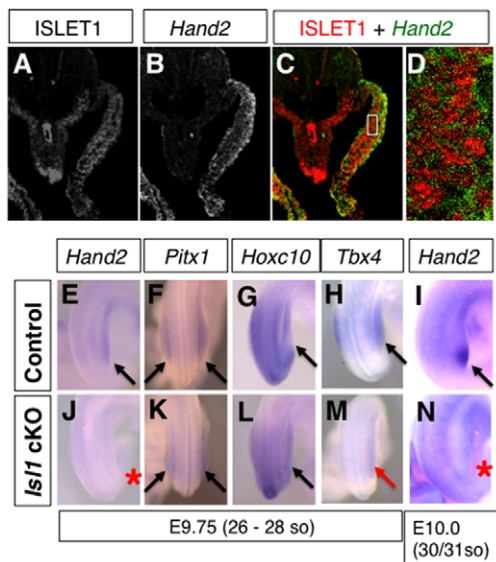

**Fig. 8. *Islet1* acts upstream of *Hand2* in the hindlimb-field and prior to *Shh* activation.** (A–D) Colocalization of *Hand2* mRNA and ISLET1. ISLET1 immunoreactivity (A), *Hand2* mRNA by in situ hybridization (B) and a merged image (C) using the same section of a hindlimb field at E9.75. (D) Higher magnification view of the LPM (boxed in C) shows nuclear signal of ISLET1 (red) and cytoplasmic *Hand2* mRNA signal (green) in the same cells. (E–N) Control (E–I) and mutant (J–N) embryos at E9.75 (26–28 somite stage) and E10.0 (30/31 somite stage) were examined for gene expression. Black arrows point to normal expression, and red arrow and asterisks point to reduced and lack of expression, respectively. *Hand2* expression in the mutant hindlimb field (J) is severely downregulated in comparison with controls (E). *Pitx1* (F,K) and *Hoxc10* (G,L) were detected in both the control (F,G) and mutant (K,L) hindlimb field. *Tbx4* expression in mutants (M) was lower than in controls (H). The characteristic expression of *Hand2* in the posterior mesenchyme (I) was absent in mutant hindlimb buds at E10.0 (N).

cells were detected in a broad region of posterior hindlimb buds at E9.75 (27–28 somite stage), and remained in the ventral part of posterior hindlimb buds at E10.0 (30–31 somite stage). We found that the cytosolic *Hand2* transcripts and nuclear ISLET1 signal colocalize in a single confocal plane within the mesenchymal cells of posterior hindlimbs at E9.75 (Fig. 8A–D). Therefore, we comparatively analyzed *Hand2* expression at E9.75 (26–28 somites) in the hindlimb-forming region.

In contrast to wild-type controls, *Hand2* expression was not detected in hindlimb buds of *Hoxb6Cre; Isll* cKO embryos at E9.75 (26–28 somite stage,  $n=2/3$ ; Fig. 8E,J). At E10.0 (30/31 somite stage), when *Hand2* expression was restricted to posterior mesenchyme in wild-type hindlimb buds (Fig. 8I), its expression could still not be detected in hindlimb buds of *Hoxb6Cre; Isll* cKO embryos ( $n=3/3$ ; Fig. 8N). By contrast, the expression of other hindlimb field markers, such as *Tbx4*, *Pitx1* and *Hoxc10*, was readily detected at E9.75, although *Tbx4* levels appeared to be reduced (Fig. 8F–H,K–M). The expression of these hindlimb-field markers suggested that the hindlimb field is correctly specified whereas the expression of *Hand2* was specifically lost in *Hoxb6Cre; Isll* cKO embryos. These results demonstrate that *Islet1* acts upstream of the *Hand2-Shh* morphoregulatory network in hindlimb buds.

*Hand2* expression is activated in a broad region of the LPM as early as E8.5 (Charite et al., 2000), raising the possibility that *Hand2* and *Islet1* interact in hindlimb progenitors prior to *Shh* activation. In the hindlimb-forming region of *Hand2*<sup>−/−</sup> embryos *Islet1* was expressed normally (supplementary material Fig. S4A–C,F–H), which indicated that *Hand2* did not regulate *Islet1* expression. As the expression domain of *Hand2* in the LPM by E9.5 is broader than that of *Islet1*, any interactions of *Islet1* and *Hand2* would be likely to take place in the hindlimb field at the time of bud initiation. Taken together, our study points to a hierarchical mechanism in which *Islet1* induces *Hand2* specifically in the hindlimb bud mesenchyme and *HAND2* in turn participates in activation of *Shh* expression and, thereby, the posterior organizer region.

## DISCUSSION

### Two phases of *Islet1* functions: initiation of hindlimb bud development and establishment of the posterior hindlimb-field upstream of *Hand2*

In this article, we identified a novel role of *Islet1* during posterior hindlimb field development in the mouse embryo. *Islet1* expression is initiated in a discrete posterior region of the embryo as early as E8.5, and continues to be expressed in the hindlimb-forming region (Yang et al., 2006). *Islet1* transcripts are downregulated in hindlimb buds by E10.0 (Fig. 7). Our recent study (Kawakami et al., 2011) and this study reveal that *Islet1* has two roles during this time window. Early inactivation of *Islet1* by the *Tcre* line resulted in complete disruption of initiating the *Fgf10-Fgf8* feedback loop and hindlimb bud outgrowth (Kawakami et al., 2011). Use of *Hoxb6Cre*, which results in later and more variable recombination than using *Tcre* (Lowe et al., 2000) (supplementary material Fig. S1), together with stability of ISLET1 proteins (Fig. 7), did not interfere with the earlier requirement of *Islet1* in most cases and allowed us to study a second, later role for *Islet1* in establishing the posterior hindlimb field. Weaker but detectable expression of *Fgf10* and *Fgf8* in *Hoxb6Cre; Isll* cKO hindlimb buds than in control (Fig. 4) illustrates bypassing of the early requirement of *Islet1*. However, a small fraction of *Hoxb6Cre; Isll* cKO embryos lacked hindlimbs (Fig. 1G–I), probably owing to variability in the timing of recombination.

Our *Hoxb6Cre*-mediated conditional knockout analysis demonstrated that *Islet1* functions upstream of the *Hand2-Shh* morphoregulatory system (Fig. 9A). Previous fate-mapping analysis has shown that *Islet1*-expressing progenitors in the hindlimb-forming region contribute to mesenchymal tissue of the hindlimb bud in a posterior to anterior gradient (Yang et al., 2006). This observation is consistent with our finding that *Hand2* expression in the posterior hindlimb-field was lost in *Hoxb6Cre; Isll* cKO embryos. The importance of regulating *Hand2* specifically during hindlimb development has also been illustrated for dolphins (Thewissen et al., 2006), which are modern mammalian cetaceans that normally lack hindlimbs. Interestingly, hindlimb bud development is initiated in dolphin embryos, but regresses owing to lack of *Shh* expression by the ZPA, which results in failure to maintain the AER, and thereby limb bud outgrowth (Capdevila and Izpisua Belmonte, 2001; Johnson and Tabin, 1997). Dolphin embryos lack *Hand2* expression specifically in the hindlimb region, whereas it is maintained in the forelimb region. These alterations bear similarities to the effects on hindlimb bud development of *Hoxb6Cre; Isll* cKO embryos (this study), which suggests that disruption of *Islet1*-mediated regulation of *Hand2* in the hindlimb field might underlie the disruption of

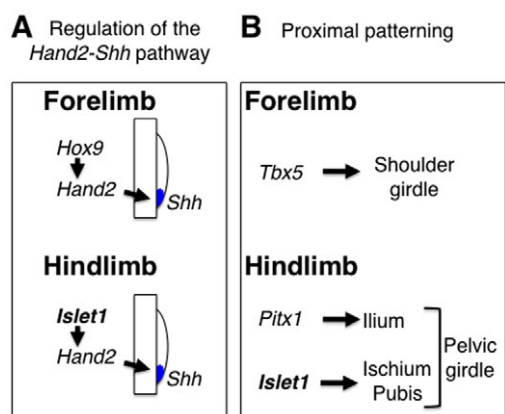

**Fig. 9. Scheme of the divergent genetic systems that control the *Hand2-Shh* morphoregulatory system and the proximal skeleton in fore- and hindlimb buds.** (A) Axial *Hox9* genes regulate the *Hand2-Shh* pathway during initiation of forelimb bud development. The present study reveals the hindlimb-specific regulation of the common *Hand2-Shh* pathway by *Isl1*. (B) A forelimb-field specific gene, *Tbx5*, is required for development of the shoulder girdle. The present study reveals that development of different segments of the pelvic girdle is controlled by either *Isl1* or *Pitx1*.

hindlimb bud development in dolphin embryos. Therefore, differential regulation of *Hand2* in forelimb- and hindlimb-forming regions is likely to be essential for species-specific variations in early limb bud development in different species.

The nascent limb field is pre-patterned by antagonistic interaction between *Hand2* in the posterior mesenchyme and *Gli3* in anterior mesenchyme (te Welscher et al., 2002). Our current study shows that in the early hindlimb bud, *Isl1* participates in this process upstream of *Hand2*. In contrast to the widespread *Hand2* expression in the LPM (Charite et al., 2000), *Isl1* expression is restricted to the posterior part of the embryo proper and the hindlimb-forming territory (Yang et al., 2006). As *Isl1* is more restricted than *Hand2*, the *Hand2* expression must also be regulated by factors other than *ISLET1*. Thus, spatial restriction of *Isl1* expression in the hindlimb-field might induce polarization of the posterior hindlimb field or early bud mesenchyme by activating the *Hand2-Shh* pathway specifically in the posterior domain.

Interestingly, *Isl1* and *Hand2* are also important for development of the second heart field. Mouse embryos lacking *Isl1* fail to develop heart structures derived from the second heart field (Cai et al., 2003), survival and expansion of which requires *Hand2* function (Tsuchihashi et al., 2011). Although the mechanisms by which *Hand2* is regulated in the second heart field remains unknown, it is tempting to speculate that *Isl1*-mediated regulation of *Hand2* expression is a shared feature of hindlimb and heart development.

### LIM-homeodomain proteins during limb development

Studies to date have identified four LIM-homeodomain proteins that function in limb development. These include *Isl1* (this study) (Kawakami et al., 2011), *Lmx1b* (Chen et al., 1998; Dreyer et al., 1998), *Lhx2* and *Lhx9* (Tzchori et al., 2009). Among these, *Isl1* functions specifically during early hindlimb bud development, whereas the others participate in both forelimb and hindlimb bud development. Detailed genetic analysis of *Lhx2*, *Lhx9*, *Lmx1b* and

their co-factor *Ldb1* established that these genes cooperate in an overlapping manner to maintain the FGF10-FGF8 and the SHH/GREM1/AER-FGF signaling feedback loops (Tzchori et al., 2009). Inactivating several of these LIM-homeodomain factors together results in a failure to maintain *Shh* and localized *Grem1* expression owing to the disrupted feedback regulation. By contrast, our data suggest that *Isl1* acts upstream of these feedback loops, which reveals its distinct functions in comparison to the other LIM-homeodomain proteins.

### Relationship between *Isl1* and the *Pitx1-Tbx4* pathway

Our recent study showed that early inactivation of *Isl1* by *Tcre* caused reduction, but not abolishment, of *Tbx4* expression without significantly altering *Pitx1* expression in the LPM (Kawakami et al., 2011). Contrary to this, the expression of *Tbx4* was not changed in hindlimb buds of *Hoxb6Cre; Isl1* cKO embryos. Thus, the regulation of *Tbx4* by *ISLET1* appears to be limited to the period preceding hindlimb bud outgrowth, whereas *Pitx1* appears to be a major regulator of *Tbx4* in developing hindlimb buds (Lancot et al., 1999). This is consistent with the observed expression of *Isl1* in the hindlimb field and early bud as its expression is terminated by E10.0.

The defects in pelvic girdle development in *Hoxb6Cre; Isl1* cKO embryos and *Pitx1*<sup>-/-</sup> embryos are distinct. In *Hoxb6Cre; Isl1* cKO embryos, the ilium developed, whereas it was missing in *Pitx1*<sup>-/-</sup> embryos. By contrast, *Hoxb6Cre; Isl1* cKO embryos lacked the pubis and ischium, which developed in *Pitx1*<sup>-/-</sup> embryos (Lancot et al., 1999; Szeto et al., 1999). Thus, *Isl1* and the *Pitx1-Tbx4* pathway seem to regulate the development of different segments of the pelvic girdle in a parallel manner. This is in contrast to development of the shoulder girdle. *Tbx5* is specifically expressed in the forelimb field (Gibson-Brown et al., 1996) and its conditional inactivation causes loss of the entire shoulder girdle (Rallis et al., 2003). Thus, the genetic program for girdle development in hindlimbs appears to be regulated in a distinct manner by *Isl1* and the *Pitx1-Tbx4* pathway, whereas *Tbx5* regulates the entire genetic program for girdle development in forelimbs (Fig. 9B).

### Evolutionary aspects of the regulation of the *Hand2-Shh* morphoregulatory system during paired appendage development

Growing evidence shows that early fore- and hindlimb development are controlled by different genetic systems (Abu-Day et al., 2011; Agarwal et al., 2003; Itou et al., 2011; Rallis et al., 2003; Robertson et al., 2007). Our data, together with the recent analysis of the functions of *Hox9* genes (Xu and Wellik, 2011), provide insight into the genetic disparities that underlie the establishment of the posterior mesenchymal organizer in the fore- and hindlimb buds. In the *Hox9* quadruple knockout, *Hand2* and *Shh* expression were not activated in forelimb buds, but hindlimb development progressed normally. It was envisaged that a similar scenario involving more posterior *Hox* paralogs would control *Hand2* and *Shh* in early hindlimb buds. However, no *Hox* genes that would regulate the early expression of *Hand2* in hindlimb buds have been identified (Wellik and Capecchi, 2003). Our data show that *Isl1* fulfills a role similar to *Hox9* paralogs and functions as a regulator of the *Hand2-Shh* morphoregulatory network in early hindlimb buds (Fig. 9A). Current evolutionary models of the origin of vertebrate appendages suggest that ancestral fin folds acquired *Shh* expression in posterior mesenchyme, which enabled



development of the fin bud (Dahn et al., 2007; Tanaka et al., 2002; Yonei-Tamura et al., 2008). Given that the *Hand2-Shh* morphoregulatory network controls both teleost pectoral fin and tetrapod limb bud development (Galli et al., 2010; Gibert et al., 2006), and as both genes are expressed in fin buds of cartilaginous fish (Dahn et al., 2007; Tanaka et al., 2002; Yonei-Tamura et al., 2008), the direct interaction of HAND2 with *Shh* cis-regulatory regions would define an evolutionarily conserved module for initiation of appendage development (Charite et al., 2000; Galli et al., 2010; Yelon et al., 2000). The apparent differences in the genetic systems (Xu and Wellik, 2011) (this study) that control fore- and hindlimb bud induction indicate that these two types of paired appendages might have arisen by differential control of the *Hand2-Shh* module.

#### Acknowledgements

We thank Dr Michael Kuehn for providing the *Hoxb6Cre* line; Dr David Zarkower for the use of the Mastercycler machine; Dr Michael B. O'Connor for the use of the Zeiss LSM710; Dr Thomas Neufeld for the use of Zeiss Axioskop2; and Austin Johnson and Jenna Richter for excellent technical help. We also thank Dr Licia Selli for sharing probes; Dr Naoyuki Wada for critical reading; and Developmental Hybridoma Bank developed under the auspices of the NICHD and maintained by The University of Iowa, Department of Biology.

#### Funding

J.I. was partly supported by a fellowship from the Cell Science Research Foundation. This work is supported by the Minnesota Medical Foundation [3962-9211-09 to Y.K.] and American Cancer Society Institutional Research Grant [IRG-58-001-52-IRG04 to Y.K.] and the Swiss National Science Foundation [310003A\_130803 to R.Z.].

#### Competing interests statement

The authors declare no competing financial interests.

#### Supplementary material

Supplementary material available online at <http://dev.biologists.org/lookup/suppl/doi:10.1242/dev.073056/-DC1>

#### References

- Abu-Daya, A., Nishimoto, S., Fairclough, L., Mohun, T. J., Logan, M. P. and Zimmerman, L. B. (2011). The secreted integrin ligand nephronectin is necessary for forelimb formation in *Xenopus tropicalis*. *Dev. Biol.* **349**, 204-212.
- Agarwal, P., Wylie, J. N., Galceran, J., Arkhitko, O., Li, C., Deng, C., Grosschedl, R. and Bruneau, B. G. (2003). Tbx5 is essential for forelimb bud initiation following patterning of the limb field in the mouse embryo. *Development* **130**, 623-633.
- Bluske, K. K., Kawakami, Y., Koyano-Nakagawa, N. and Nakagawa, Y. (2009). Differential activity of Wnt/beta-catenin signaling in the embryonic mouse thalamus. *Dev. Dyn.* **238**, 3297-3309.
- Cai, C. L., Liang, X., Shi, Y., Chu, P. H., Pfaff, S. L., Chen, J. and Evans, S. (2003). Isl1 identifies a cardiac progenitor population that proliferates prior to differentiation and contributes a majority of cells to the heart. *Dev. Cell* **5**, 877-889.
- Capdevila, J. and Izpisua Belmonte, J. C. (2001). Patterning mechanisms controlling vertebrate limb development. *Annu. Rev. Cell Dev. Biol.* **17**, 87-132.
- Capellini, T. D., Handschuh, K., Quintana, L., Ferretti, E., Di Giacomo, G., Fantini, S., Vaccari, G., Clarke, S. L., Wenger, A. M., Bejerano, G. et al. (2011). Control of pelvic girdle development by genes of the Pbx family and *Emx2*. *Dev. Dyn.* **240**, 1173-1189.
- Charite, J., McFadden, D. G. and Olson, E. N. (2000). The bHLH transcription factor dHAND controls Sonic hedgehog expression and establishment of the zone of polarizing activity during limb development. *Development* **127**, 2461-2470.
- Chen, H., Lun, Y., Ovchinnikov, D., Kokubo, H., Oberg, K. C., Picicelli, C. V., Gan, L., Lee, B. and Johnson, R. L. (1998). Limb and kidney defects in *Lmx1b* mutant mice suggest an involvement of LMX1B in human nail patella syndrome. *Nat. Genet.* **19**, 51-55.
- Chiang, C., Litingtung, Y., Lee, E., Young, K. E., Corden, J. L., Westphal, H. and Beachy, P. A. (1996). Cyclopia and defective axial patterning in mice lacking Sonic hedgehog gene function. *Nature* **383**, 407-413.
- Chiang, C., Litingtung, Y., Harris, M. P., Simandl, B. K., Li, Y., Beachy, P. A. and Fallon, J. F. (2001). Manifestation of the limb prepattern: limb development in the absence of sonic hedgehog function. *Dev. Biol.* **236**, 421-435.
- Dahn, R. D., Davis, M. C., Pappano, W. N. and Shubin, N. H. (2007). Sonic hedgehog function in chondrichthyan fins and the evolution of appendage patterning. *Nature* **445**, 311-314.
- DeLaurier, A., Schweitzer, R. and Logan, M. (2006). Pitx1 determines the morphology of muscle, tendon, and bones of the hindlimb. *Dev. Biol.* **299**, 22-34.
- Dreyer, S. D., Zhou, G., Baldini, A., Winterpacht, A., Zabel, B., Cole, W., Johnson, R. L. and Lee, B. (1998). Mutations in LMX1B cause abnormal skeletal patterning and renal dysplasia in nail patella syndrome. *Nat. Genet.* **19**, 47-50.
- Fernandez-Teran, M., Piedra, M. E., Kathiriyai, I. S., Srivastava, D., Rodriguez-Rey, J. C. and Ros, M. A. (2000). Role of dHAND in the anterior-posterior polarization of the limb bud: implications for the Sonic hedgehog pathway. *Development* **127**, 2133-2142.
- Galli, A., Robay, D., Osterwalder, M., Bao, X., Benazet, J. D., Tariq, M., Paro, R., Mackem, S. and Zeller, R. (2010). Distinct roles of Hand2 in initiating polarity and posterior Shh expression during the onset of mouse limb bud development. *PLoS Genet.* **6**, e1000901.
- Gibert, Y., Gajewski, A., Meyer, A. and Begemann, G. (2006). Induction and pre-patterning of the zebrafish pectoral fin bud requires axial retinoic acid signaling. *Development* **133**, 2649-2659.
- Gibson-Brown, J. J., Agulnik, S. I., Chapman, D. L., Alexiou, M., Garvey, N., Silver, L. M. and Papaioannou, V. E. (1996). Evidence of a role for T-box genes in the evolution of limb morphogenesis and the specification of forelimb/hindlimb identity. *Mech. Dev.* **56**, 93-101.
- Harfe, B. D., Scherz, P. J., Nissim, S., Tian, H., McMahon, A. P. and Tabin, C. J. (2004). Evidence for an expansion-based temporal Shh gradient in specifying vertebrate digit identities. *Cell* **118**, 517-528.
- Itou, J., Taniguchi, N., Oishi, I., Kawakami, H., Lotz, M. and Kawakami, Y. (2011). HMGB factors are required for posterior digit development through integrating signaling pathway activities. *Dev. Dyn.* **240**, 1151-1162.
- Johnson, R. L. and Tabin, C. J. (1997). Molecular models for vertebrate limb development. *Cell* **90**, 979-990.
- Kawakami, Y., Uchiyama, Y., Rodriguez Esteban, C., Inenaga, T., Koyano-Nakagawa, N., Kawakami, H., Marti, M., Kmita, M., Monaghan-Nichols, P., Nishinakamura, R. et al. (2009). Sall genes regulate region-specific morphogenesis in the mouse limb by modulating Hox activities. *Development* **136**, 585-594.
- Kawakami, Y., Marti, M., Kawakami, H., Itou, J., Quach, T., Johnson, A., Sahara, S., O'Leary, D. D., Nakagawa, Y., Lewandoski, M. et al. (2011). *Isl1*-mediated activation of the beta-catenin pathway is necessary for hindlimb initiation in mice. *Development* **138**, 4465-4473.
- Kraus, P., Fraidtenraich, D. and Loomis, C. A. (2001). Some distal limb structures develop in mice lacking Sonic hedgehog signaling. *Mech. Dev.* **100**, 45-58.
- Krauss, S., Concordet, J. P. and Ingham, P. W. (1993). A functionally conserved homolog of the *Drosophila* segment polarity gene *hh* is expressed in tissues with polarizing activity in zebrafish embryos. *Cell* **75**, 1431-1444.
- Krawchuk, D., Weiner, S. J., Chen, Y. T., Lu, B. C., Costantini, F., Behringer, R. R. and Laufer, E. (2010). Twist1 activity thresholds define multiple functions in limb development. *Dev. Biol.* **347**, 133-146.
- Kuijper, S., Beverdam, A., Kroon, C., Brouwer, A., Candille, S., Barsh, G. and Meijlink, F. (2005). Genetics of shoulder girdle formation: roles of Tbx15 and *aristalless*-like genes. *Development* **132**, 1601-1610.
- Lancot, C., Moreau, A., Chamberland, M., Tremblay, M. L. and Drouin, J. (1999). Hindlimb patterning and mandible development require the Ptx1 gene. *Development* **126**, 1805-1810.
- Li, C., Xu, X., Nelson, D. K., Williams, T., Kuehn, M. R. and Deng, C. X. (2005). FGFR1 function at the earliest stages of mouse limb development plays an indispensable role in subsequent autopod morphogenesis. *Development* **132**, 4755-4764.
- Logan, M. and Tabin, C. J. (1999). Role of Pitx1 upstream of Tbx4 in specification of hindlimb identity. *Science* **283**, 1736-1739.
- Logan, M., Martin, J. F., Nagy, A., Lobe, C., Olson, E. N. and Tabin, C. J. (2002). Expression of Cre Recombinase in the developing mouse limb bud driven by a Pxl enhancer. *Genesis* **33**, 77-80.
- Lowe, L. A., Yamada, S. and Kuehn, M. R. (2000). HoxB6-Cre transgenic mice express Cre recombinase in extra-embryonic mesoderm, in lateral plate and limb mesoderm and at the midbrain/hindbrain junction. *Genesis* **26**, 118-120.
- Marcel, A., Dumontier, E., Chamberland, M., Camper, S. A. and Drouin, J. (2003). Pitx1 and Pitx2 are required for development of hindlimb buds. *Development* **130**, 45-55.
- McFadden, D. G., McAnally, J., Richardson, J. A., Charite, J. and Olson, E. N. (2002). Misexpression of dHAND induces ectopic digits in the developing limb bud in the absence of direct DNA binding. *Development* **129**, 3077-3088.
- McIntyre, D. C., Rakshit, S., Yallowitz, A. R., Loken, L., Jeannotte, L., Capecchi, M. R. and Wellik, D. M. (2007). Hox patterning of the vertebrate rib cage. *Development* **134**, 2981-2989.
- Mill, P., Mo, R., Hu, M. C., Dagnino, L., Rosenblum, N. D. and Hui, C. C. (2005). Shh controls epithelial proliferation via independent pathways that converge on N-Myc. *Dev. Cell* **9**, 293-303.

- Minguillon, C., Del Buono, J. and Logan, M. P. (2005). Tbx5 and Tbx4 are not sufficient to determine limb-specific morphologies but have common roles in initiating limb outgrowth. *Dev. Cell* **8**, 75-84.
- Naiche, L. A. and Papaioannou, V. E. (2003). Loss of Tbx4 blocks hindlimb development and affects vascularization and fusion of the allantois. *Development* **130**, 2681-2693.
- Naiche, L. A. and Papaioannou, V. E. (2007). Tbx4 is not required for hindlimb identity or post-bud hindlimb outgrowth. *Development* **134**, 93-103.
- Ouimette, J.-F., Jolin, M. L., L'honore, A., Gifuni, A. and Drouin, J. (2010). Divergent transcriptional activities determine limb identity. *Nat. Commun.* **1**, 1-9.
- Pfaff, S. L., Mendelsohn, M., Stewart, C. L., Edlund, T. and Jessell, T. M. (1996). Requirement for LIM homeobox gene Isl1 in motor neuron generation reveals a motor neuron-dependent step in interneuron differentiation. *Cell* **84**, 309-320.
- Rallis, C., Bruneau, B. G., Del Buono, J., Seidman, C. E., Seidman, J. G., Nissim, S., Tabin, C. J. and Logan, M. P. (2003). Tbx5 is required for forelimb bud formation and continued outgrowth. *Development* **130**, 2741-2751.
- Riddle, R. D., Johnson, R. L., Laufer, E. and Tabin, C. (1993). Sonic hedgehog mediates the polarizing activity of the ZPA. *Cell* **75**, 1401-1416.
- Robertson, E. J., Charatsi, I., Joyner, C. J., Koonce, C. H., Morgan, M., Islam, A., Paterson, C., Lejsek, E., Arnold, S. J., Kallies, A. et al. (2007). Blimp1 regulates development of the posterior forelimb, caudal pharyngeal arches, heart and sensory vibrissae in mice. *Development* **134**, 4335-4345.
- Roy, S. and Ingham, P. W. (2002). Hedgehogs tryst with the cell cycle. *J. Cell Sci.* **115**, 4393-4397.
- Song, M. R., Sun, Y., Bryson, A., Gill, G. N., Evans, S. M. and Pfaff, S. L. (2009). Islet-1-LMO stoichiometries control the function of transcription complexes that specify motor neuron and V2a interneuron identity. *Development* **136**, 2923-2932.
- Sun, Y., Dykes, I. M., Liang, X., Eng, S. R., Evans, S. M. and Turner, E. E. (2008). A central role for Islet1 in sensory neuron development linking sensory and spinal gene regulatory programs. *Nat. Neurosci.* **11**, 1283-1293.
- Szeto, D. P., Rodriguez-Esteban, C., Ryan, A. K., O'Connell, S. M., Liu, F., Kioussi, C., Gleiberman, A. S., Izpisua-Belmonte, J. C. and Rosenfeld, M. G. (1999). Role of the Bicoid-related homeodomain factor Ptx1 in specifying hindlimb morphogenesis and pituitary development. *Genes Dev.* **13**, 484-494.
- Tanaka, M., Munsterberg, A., Anderson, W. G., Prescott, A. R., Hazon, N. and Tickle, C. (2002). Fin development in a cartilaginous fish and the origin of vertebrate limbs. *Nature* **416**, 527-531.
- te Welscher, P., Fernandez-Teran, M., Ros, M. A. and Zeller, R. (2002). Mutual genetic antagonism involving GLI3 and dHAND prepatterns the vertebrate limb bud mesenchyme prior to SHH signaling. *Genes Dev.* **16**, 421-426.
- ten Berge, D., Brouwer, A., Korving, J., Martin, J. F. and Meijlink, F. (1998). Prx1 and Prx2 in skeletogenesis: roles in the craniofacial region, inner ear and limbs. *Development* **125**, 3831-3842.
- ten Berge, D., Brugmann, S. A., Helms, J. A. and Nusse, R. (2008). Wnt and FGF signals interact to coordinate growth with cell fate specification during limb development. *Development* **135**, 3247-3257.
- Thewissen, J. G., Cohn, M. J., Stevens, L. S., Bajpai, S., Heyning, J. and Horton, W. E., Jr (2006). Developmental basis for hind-limb loss in dolphins and origin of the cetacean bodyplan. *Proc. Natl. Acad. Sci. USA* **103**, 8414-8418.
- Towers, M. and Tickle, C. (2009). Growing models of vertebrate limb development. *Development* **136**, 179-190.
- Towers, M., Mahood, R., Yin, Y. and Tickle, C. (2008). Integration of growth and specification in chick wing digit-patterning. *Nature* **452**, 882-886.
- Tsuchihashi, T., Maeda, J., Shin, C. H., Ivey, K. N., Black, B. L., Olson, E. N., Yamagishi, H. and Srivastava, D. (2011). Hand2 function in second heart field progenitors is essential for cardiogenesis. *Dev. Biol.* **351**, 62-69.
- Tzchori, I., Day, T. F., Carolan, P. J., Zhao, Y., Wassif, C. A., Li, L., Lewandoski, M., Gorivodsky, M., Love, P. E., Porter, F. D. et al. (2009). LIM homeobox transcription factors integrate signaling events that control three-dimensional limb patterning and growth. *Development* **136**, 1375-1385.
- Wellik, D. M. (2007). Hox patterning of the vertebrate axial skeleton. *Dev. Dyn.* **236**, 2454-2463.
- Wellik, D. M. and Capecchi, M. R. (2003). Hox10 and Hox11 genes are required to globally pattern the mammalian skeleton. *Science* **301**, 363-367.
- Wilkinson, D. G. (1993). Whole mount in situ hybridization of vertebrate embryos. In *In Situ Hybridization*. Oxford: Oxford University Press.
- Xu, B. and Wellik, D. M. (2011). Axial Hox9 activity establishes the posterior field in the developing forelimb. *Proc. Natl. Acad. Sci. USA* **108**, 4888-4891.
- Yang, L., Cai, C. L., Lin, L., Qyang, Y., Chung, C., Monteiro, R. M., Mummery, C. L., Fishman, G. I., Cogen, A. and Evans, S. (2006). Isl1Cre reveals a common Bmp pathway in heart and limb development. *Development* **133**, 1575-1585.
- Yang, Y., Drossopoulou, G., Chuang, P. T., Duprez, D., Marti, E., Bumcrot, D., Vargesson, N., Clarke, J., Niswander, L., McMahon, A. et al. (1997). Relationship between dose, distance and time in Sonic Hedgehog-mediated regulation of anteroposterior polarity in the chick limb. *Development* **124**, 4393-4404.
- Yelon, D., Ticho, B., Halpern, M. E., Ruvinsky, I., Ho, R. K., Silver, L. M. and Stainier, D. Y. (2000). The bHLH transcription factor hand2 plays parallel roles in zebrafish heart and pectoral fin development. *Development* **127**, 2573-2582.
- Yonei-Tamura, S., Abe, G., Tanaka, Y., Anno, H., Noro, M., Ide, H., Aono, H., Kuraishi, R., Osumi, N., Kuratani, S. et al. (2008). Competent stripes for diverse positions of limbs/fins in gnathostome embryos. *Evol. Dev.* **10**, 737-745.
- Zeller, R., Lopez-Rios, J. and Zuniga, A. (2009). Vertebrate limb bud development: moving towards integrative analysis of organogenesis. *Nat. Rev. Genet.* **10**, 845-858.
- Zhu, J., Nakamura, E., Nguyen, M. T., Bao, X., Akiyama, H. and Mackem, S. (2008). Uncoupling Sonic hedgehog control of pattern and expansion of the developing limb bud. *Dev. Cell* **14**, 624-632.
- Zuniga, A., Haramis, A. P., McMahon, A. P. and Zeller, R. (1999). Signal relay by BMP antagonism controls the SHH/FGF4 feedback loop in vertebrate limb buds. *Nature* **401**, 598-602.
